# Supplementary material for: Comprehensive identification of bHLH transcription factors in Litsea cubeba reveals candidate gene involved in the monoterpene biosynthesis pathway
Source: Frontiers journal article supplement (doi:10.3389/fpls.2022.1081335), 2022-12-21
Supplement: Data_Sheet_1.ZIP [file Data_Sheet_1.ZIP]

## Sheet: Sheet1
Table S1 Information of bHLH family genes in L.cubeba
Gene Name	gemome_id	Len	Lene	Protein length	Molecular weight	Theoretical isoelectric point	GRAVY
LcbHLH1	Lcu01G_00175	3466601	3477002	373	39468.9	6.39	-0.436
LcbHLH2	Lcu01G_00383	7821749	7835005	666	75097.5	5.12	-0.472
LcbHLH3	Lcu01G_00653	13021721	13025491	295	32361	5.98	-0.586
LcbHLH4	Lcu01G_00825	19762405	19766240	401	43948.9	6.17	-0.653
LcbHLH5	Lcu01G_01172	32652099	32657247	394	43787.7	7.23	-0.697
LcbHLH6	Lcu01G_01430	50466322	50476785	544	59644.4	5.29	-0.553
LcbHLH7	Lcu01G_01957	113911712	113917082	379	42714.5	4.87	-0.442
LcbHLH8	Lcu01G_01978	114654883	114659985	310	33806.9	6.45	-0.541
LcbHLH9	Lcu01G_02247	122996947	123001079	442	48646.4	8.55	-0.639
LcbHLH10	Lcu01G_02255	123157776	123168675	386	42148.7	5.34	-0.613
LcbHLH11	Lcu01G_02597	133240676	133241716	148	16680.1	5.14	-0.32
LcbHLH12	Lcu01G_02973	143025123	143033297	496	54353.3	5.33	-0.468
LcbHLH13	Lcu01G_03153	147911240	147914830	593	63753.9	5.7	-0.591
LcbHLH14	Lcu01G_03348	152568651	152569324	189	21396.3	8.8	-0.592
LcbHLH15	Lcu01G_03521	157028703	157030967	340	37412.1	6.2	-0.49
LcbHLH16	Lcu02G_04009	9231324	9237581	435	46410.6	6.3	-0.656
LcbHLH17	Lcu02G_04024	9535948	9545038	337	36933.1	9.19	-0.928
LcbHLH18	Lcu02G_04254	14832935	14836790	237	26845.5	5.51	-0.488
LcbHLH19	Lcu02G_04258	14949678	14953595	253	28882.6	5.2	-0.549
LcbHLH20	Lcu02G_04323	16809590	16817078	394	44074.9	7.06	-0.488
LcbHLH21	Lcu02G_04393	18616972	18623830	501	56403	6.68	-0.751
LcbHLH22	Lcu02G_04435	19346476	19354487	289	32417.1	4.49	-0.657
LcbHLH23	Lcu02G_04458	19823591	19826228	266	29408.3	6.31	-0.423
LcbHLH24	Lcu02G_04483	20378059	20384395	397	44460.8	4.95	-0.511
LcbHLH25	Lcu02G_04537	21346453	21347871	375	41191.3	6.57	-0.402
LcbHLH26	Lcu02G_04551	21791343	21794913	467	50525.3	7.65	-0.495
LcbHLH27	Lcu02G_04690	24382369	24389182	308	33162.8	5.87	-0.654
LcbHLH28	Lcu02G_04734	25860355	25866021	112	12909	9.17	-0.52
LcbHLH29	Lcu02G_04829	27876506	27887913	254	27972.2	5.58	-0.718
LcbHLH30	Lcu02G_05410	40664235	40671386	554	59421.1	5.55	-0.538
LcbHLH31	Lcu02G_05473	42823357	42836921	243	27451.2	8.55	-0.649
LcbHLH32	Lcu02G_05474	42855365	42856798	272	30853.7	9.33	-0.377
LcbHLH33	Lcu02G_05644	46904288	46914324	276	31256	9.4	-0.678
LcbHLH34	Lcu02G_06488	82491921	82494446	324	36146.3	5.84	-0.742
LcbHLH35	Lcu02G_06506	82814303	82815625	174	19741.8	8.91	-0.253
LcbHLH36	Lcu02G_06717	88584352	88590510	544	59897.4	6.33	-0.6
LcbHLH37	Lcu02G_06752	89170643	89171576	273	30446.5	4.72	-0.385
LcbHLH38	Lcu02G_06753	89174084	89178279	293	32721.4	4.96	-0.262
LcbHLH39	Lcu02G_07239	99933100	99934888	228	25684.1	9.37	-0.654
LcbHLH40	Lcu02G_07263	100624563	100642157	707	79360	5.58	-0.617
LcbHLH41	Lcu02G_07273	100864169	100865008	182	20444.8	9.22	-0.137
LcbHLH42	Lcu02G_07351	102731728	102732408	226	25400.7	6.04	-0.593
LcbHLH43	Lcu02G_07469	105885118	105887558	328	36690.3	5.04	-0.398
LcbHLH44	Lcu02G_07545	107270976	107271736	90	9974.23	7.94	-0.474
LcbHLH45	Lcu02G_07863	114159808	114172187	207	23467.9	5.28	-0.299
LcbHLH46	Lcu02G_08026	117925709	117927935	491	54264.8	6.84	-0.353
LcbHLH47	Lcu02G_08168	121782997	121784261	299	33937.2	4.87	-0.581
LcbHLH48	Lcu02G_08344	130032014	130046982	653	74038.1	7.67	-1.062
LcbHLH49	Lcu02G_08430	135500242	135516340	550	60416.6	6.3	-0.832
LcbHLH50	Lcu02G_08438	135996689	136012595	403	44513.2	6.28	-0.813
LcbHLH51	Lcu02G_08454	137083271	137105535	552	60546.6	5.97	-0.6
LcbHLH52	Lcu03G_08571	262608	265726	467	50543.3	5.27	-0.537
LcbHLH53	Lcu03G_08595	731417	734586	318	35759.6	6.35	-0.506
LcbHLH54	Lcu03G_08682	2209007	2212377	442	47715.1	8.42	-0.539
LcbHLH55	Lcu03G_08828	4715101	4718739	665	72573	5.53	-0.449
LcbHLH56	Lcu03G_09119	12637260	12640846	547	58850.4	6.78	-0.645
LcbHLH57	Lcu03G_09381	18706377	18709809	347	38640.1	6.33	-0.687
LcbHLH58	Lcu03G_09404	19213322	19218270	511	56022.5	5	-0.541
LcbHLH59	Lcu03G_09569	23430910	23432881	637	70320.2	5.63	-0.583
LcbHLH60	Lcu03G_09762	32808504	32816844	258	28278.9	9.3	-0.534
LcbHLH61	Lcu03G_09862	39631620	39632905	255	28940.7	9.55	-0.207
LcbHLH62	Lcu03G_10346	84551166	84556339	434	48071.6	8.18	-0.589
LcbHLH63	Lcu03G_10973	136833214	136834541	251	28371.2	6.7	-0.551
LcbHLH64	Lcu03G_10989	137982554	137985513	204	22924.2	9.28	-0.633
LcbHLH65	Lcu03G_11117	148123588	148126778	397	45031.6	5.88	-0.631
LcbHLH66	Lcu04G_11298	2144208	2147997	253	27386.3	9.34	-0.291
LcbHLH67	Lcu04G_11468	7590987	7592744	475	51528.3	5.38	-0.516
LcbHLH68	Lcu04G_11516	8330087	8335866	519	58531.3	6.71	-0.446
LcbHLH69	Lcu04G_12155	68751037	68753191	251	28617.5	7.25	-0.594
LcbHLH70	Lcu04G_12253	76952936	76968364	706	76925.6	8.63	-0.483
LcbHLH71	Lcu04G_12334	81622647	81642616	180	19961.6	8.71	-0.465
LcbHLH72	Lcu04G_12365	83251479	83254337	238	26673.9	5.98	-0.521
LcbHLH73	Lcu04G_12468	86262002	86262441	106	11944.9	7.82	-0.521
LcbHLH74	Lcu04G_12471	86359785	86360203	99	11161.9	8.73	-0.557
LcbHLH75	Lcu04G_13370	109943489	109962394	1098	126542	5.84	-0.372
LcbHLH76	Lcu04G_13968	125515010	125516113	275	30900.6	8.66	-0.212
LcbHLH77	Lcu04G_14069	127836297	127840348	329	37425.5	6.08	-0.446
LcbHLH78	Lcu04G_14075	127971161	127974010	632	69192.9	5.43	-0.477
LcbHLH79	Lcu04G_14125	128757837	128759055	203	23258.8	9.8	-0.542
LcbHLH80	Lcu04G_14426	135258304	135258788	143	16063.2	9.14	-0.654
LcbHLH81	Lcu04G_14685	140394987	140401718	254	28113.7	6.11	-0.646
LcbHLH82	Lcu04G_14693	140486671	140487329	92	10343.6	9.09	-0.579
LcbHLH83	Lcu05G_14984	2086384	2088824	219	25164.2	7.17	-0.51
LcbHLH84	Lcu05G_15489	24709833	24722877	139	15667.2	9.58	-0.384
LcbHLH85	Lcu05G_15558	29748767	29762913	275	30611.7	9.07	-0.757
LcbHLH86	Lcu05G_15601	33475171	33475499	108	12548.3	9.4	-0.771
LcbHLH87	Lcu05G_15947	58592147	58597407	172	19150.4	5.66	-0.51
LcbHLH88	Lcu05G_15995	60751887	60772437	272	30441	4.99	-0.838
LcbHLH89	Lcu05G_16110	64749532	64753271	329	36004.2	6.23	-0.57
LcbHLH90	Lcu05G_16753	81201552	81203886	372	41689.2	4.93	-0.665
LcbHLH91	Lcu05G_16795	81901996	81907991	335	37736.7	9.29	-0.644
LcbHLH92	Lcu05G_16822	82446665	82453008	386	44050.2	4.69	-0.61
LcbHLH93	Lcu05G_16859	83135825	83138586	394	43046.2	7.13	-0.554
LcbHLH94	Lcu05G_16878	83648964	83651121	233	25461.8	9.13	-0.564
LcbHLH95	Lcu05G_16948	84974226	84978078	413	45499.8	9.12	-0.443
LcbHLH96	Lcu05G_17084	88070274	88077885	261	29505.3	5.14	-0.588
LcbHLH97	Lcu05G_17321	92865311	92867553	423	46840.5	4.77	-0.507
LcbHLH98	Lcu05G_17328	93007874	93016813	415	45228.3	6.01	-0.534
LcbHLH99	Lcu05G_17378	93794041	93798013	416	46513.1	5.53	-0.683
LcbHLH100	Lcu05G_17616	98680631	98682919	236	27027.8	6.24	-0.491
LcbHLH101	Lcu05G_18245	110851724	110855262	185	20890.3	9.43	-0.279
LcbHLH102	Lcu05G_18246	110869490	110871345	177	19649.6	9.17	-0.219
LcbHLH103	Lcu05G_18248	110937521	110946571	178	20020	8.69	-0.249
LcbHLH104	Lcu06G_18700	10139995	10151645	301	34057.9	6.32	-0.589
LcbHLH105	Lcu06G_18904	13844572	13847871	315	35311.8	5.78	-0.41
LcbHLH106	Lcu06G_19438	26838129	26841752	232	25813.2	5.81	-0.713
LcbHLH107	Lcu06G_19827	38567196	38569832	471	52867.1	5.46	-0.948
LcbHLH108	Lcu06G_20226	75672811	75679544	330	35617.6	8.13	-0.556
LcbHLH109	Lcu07G_20674	4346519	4354224	576	62807.7	5.42	-0.614
LcbHLH110	Lcu07G_20881	16791130	16799191	575	62319.7	5.54	-0.474
LcbHLH111	Lcu07G_20883	16870947	16880143	621	67407.4	5.55	-0.472
LcbHLH112	Lcu07G_21195	45502433	45504027	235	26513.1	9.03	-0.569
LcbHLH113	Lcu07G_21205	46231015	46232612	235	26496	8.82	-0.577
LcbHLH114	Lcu07G_21235	49708317	49711414	389	44015.5	5.77	-0.295
LcbHLH115	Lcu07G_21804	67590980	67597772	211	23689.2	7.07	-0.362
LcbHLH116	Lcu07G_21927	69731163	69743553	522	55224.5	5.54	-0.415
LcbHLH117	Lcu07G_22418	80267447	80269140	240	26374.8	9.27	-0.535
LcbHLH118	Lcu07G_22427	80533218	80547701	700	78508.9	5.18	-0.619
LcbHLH119	Lcu07G_22435	80632373	80635030	187	20872.2	8.27	-0.083
LcbHLH120	Lcu07G_22437	80660374	80671977	286	31031.4	6.14	-0.303
LcbHLH121	Lcu08G_22845	11084806	11088343	456	50242.9	5.14	-0.585
LcbHLH122	Lcu08G_23348	49137353	49143174	526	58351.7	6.23	-0.665
LcbHLH123	Lcu08G_23529	56784296	56786436	471	51798.6	6.02	-0.444
LcbHLH124	Lcu08G_23571	57980156	57989403	309	33195.4	6.01	-0.502
LcbHLH125	Lcu08G_23704	61419098	61429251	289	32056.2	4.49	-0.3
LcbHLH126	Lcu08G_23896	64990883	64992535	195	21421.6	11.51	-0.598
LcbHLH127	Lcu08G_24047	67922388	67927793	270	30576.2	5.77	-0.401
LcbHLH128	Lcu08G_24051	68037055	68039962	467	52871.6	5.3	-0.611
LcbHLH129	Lcu08G_24065	68291973	68296197	251	28618.9	5.95	-0.457
LcbHLH130	Lcu08G_24079	68481454	68487696	895	96594.6	5.76	-0.241
LcbHLH131	Lcu08G_24120	69755233	69761299	882	95757.5	6.56	-0.307
LcbHLH132	Lcu08G_24361	74731018	74733604	394	44015.4	6.25	-0.527
LcbHLH133	Lcu08G_24479	76728006	76731630	453	49493.6	5.78	-0.577
LcbHLH134	Lcu09G_24671	1474531	1483562	515	55546	6.26	-0.698
LcbHLH135	Lcu09G_24790	3342063	3342776	237	25964.1	8.48	-0.71
LcbHLH136	Lcu09G_24864	4642983	4647737	179	20716.6	6.1	-0.64
LcbHLH137	Lcu09G_25158	12593531	12596769	605	62747.3	6.57	-0.617
LcbHLH138	Lcu09G_25466	23562774	23568342	144	16122.5	8.53	-0.439
LcbHLH139	Lcu10G_26100	1382570	1388515	718	77292.6	7.61	-0.572
LcbHLH140	Lcu10G_26633	11014340	11016041	176	19880.9	7.83	-0.437
LcbHLH141	Lcu10G_26634	11031597	11032651	161	18405.2	8.56	-0.468
LcbHLH142	Lcu10G_26635	11061802	11063255	156	17711.4	6.84	-0.456
LcbHLH143	Lcu10G_26636	11110583	11111633	180	20967.9	7.86	-0.613
LcbHLH144	Lcu10G_26721	13050301	13071991	434	48502.7	8.68	-0.141
LcbHLH145	Lcu10G_27240	35025400	35028760	620	68609.4	6.22	-0.452
LcbHLH146	Lcu10G_27391	42737794	42739859	317	34923.6	5.83	-0.524
LcbHLH147	Lcu11G_27714	124792	127842	92	10243.6	7.95	-0.423
LcbHLH148	Lcu11G_27739	581761	583445	134	15174.4	6.37	-0.363
LcbHLH149	Lcu11G_28275	10495443	10504711	355	38709.5	5.58	-0.419
LcbHLH150	Lcu11G_28300	10949636	10950349	237	25927.9	9.22	-0.305
LcbHLH151	Lcu11G_28430	13712524	13712979	151	16350.9	4.78	-0.736
LcbHLH152	Lcu11G_28446	14108103	14110970	311	34750.2	5.3	-0.463
LcbHLH153	Lcu11G_28638	20660129	20745186	303	33461.3	8.33	-0.926
LcbHLH154	Lcu11G_29034	48365674	48369130	230	25716.9	5.38	-0.749
LcbHLH155	Lcu11G_29274	57454083	57471812	652	73407.1	6.03	-0.454
LcbHLH156	Lcu11G_29399	61458783	61471883	702	77657.3	6.42	-0.297
LcbHLH157	Lcu11G_29401	61532752	61542271	213	23869.1	7.63	-0.644
LcbHLH158	Lcu12G_29550	1463545	1467738	291	31769.1	5.57	-0.664
LcbHLH159	Lcu12G_29626	3669267	3670724	465	51317.4	6.18	-0.545
LcbHLH160	NA	NA	NA	212	23743.8	5.86	-0.611
LcbHLH161	NA	NA	NA	224	24517.3	9.27	-0.289
LcbHLH162	NA	NA	NA	224	24503.2	9.27	-0.299
LcbHLH163	NA	NA	NA	270	30576.2	5.77	-0.401
LcbHLH164	NA	NA	NA	460	51892.5	5.43	-0.587
LcbHLH165	NA	NA	NA	251	28536.8	5.75	-0.436
LcbHLH166	NA	NA	NA	336	37383.1	6.14	-0.768
LcbHLH167	NA	NA	NA	413	45983	6.77	-0.455
LcbHLH168	NA	NA	NA	507	56114.3	6.25	-0.743
LcbHLH169	NA	NA	NA	507	56100.3	6.25	-0.747
LcbHLH170	NA	NA	NA	432	47897.3	7.31	-0.619
LcbHLH171	NA	NA	NA	198	22713.3	6.26	-0.494
LcbHLH172	NA	NA	NA	400	43802.7	6.09	-0.637
LcbHLH173	NA	NA	NA	471	52475.5	5.53	-0.631
